# Supplementary material
Source: MDPI journal article supplement (https://www.mdpi.com/2073-4352/8/2/103)
Supplement: s1 [file s1]

Supporting Information

Synthesis, Crystal Structure Analysis and Decomposition of RbAlH4

Claudia Weidenthaler *,†, Michael Felderhoff †, Thomas Bernert †, Magnus H. Sørby ‡, Bjørn C. Hauback ‡, and Daniel Krech †

† Max-Planck-Institut für Kohlenforschung , D-45470 Mülheim an der Ruhr, Germany

‡ Institute for Energy Technology (IFE), P.O. Box 40, NO-2027 Kjeller, Norway


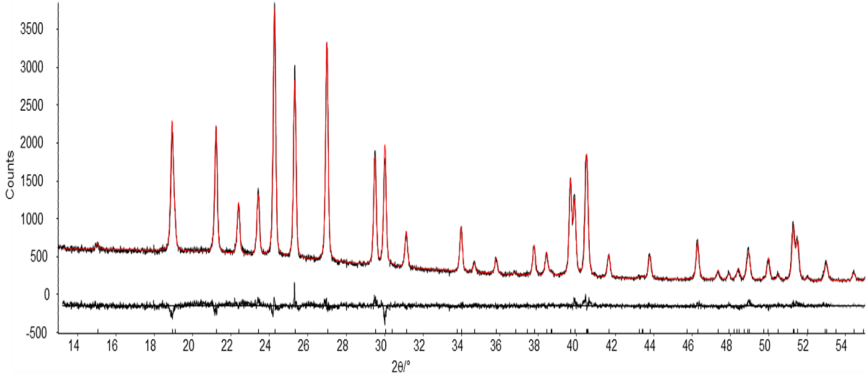


**Figure S1.** Rietveld refinement of RbAlH4 laboratory PXD data obtained from mechanochemical synthesis from RbF and LiAlD4 after purification.
